1           **Effects of 5-aza-2'-deoxycytidine on human osteoarthritic chondrocytes**

2

3

4 Shirin Kadler<sup>1\*</sup> ([shirin.kadler@tu-berlin.de](mailto:shirin.kadler@tu-berlin.de)), Özlem Vural<sup>1</sup> ([oezlem.vural@tu-berlin.de](mailto:oezlem.vural@tu-berlin.de)),

5 Luzia Reiners-Schramm<sup>1</sup> ([luzia.reiners-schramm@tu-berlin.de](mailto:luzia.reiners-schramm@tu-berlin.de)), Roland Lauster<sup>1</sup>

6 ([roland.lauster@tu-berlin.de](mailto:roland.lauster@tu-berlin.de)), Mark Rosowski<sup>1</sup> ([mark.rosowski@tu-berlin.de](mailto:mark.rosowski@tu-berlin.de)),

7

8 <sup>1</sup>Department of Medical Biotechnology, Institute of Biotechnology, Technische

9 Universität Berlin, Berlin, Germany

10

11 \*Corresponding author

12

13 keywords: osteoarthritis, chondrocytes, de-differentiation, DNA methylation, 5mC,

14 chondrogenesis, 5-aza-2'-deoxycytidine, 5-aza-dC, DNMT, epigenetics

15

16

17

18

19

20

21

22

23

24

25

26 **Abstract**

27 **Background**

28 Given regenerative therapies, the utilization of primary human cells is desired and  
29 requested in the development of *in vitro* systems and disease models. After a few  
30 passages *in vitro*, all cells from the connective tissue end up in a similar fibroblastoid  
31 cell type marked by loss of the specific expression pattern. It is still under discussion  
32 whether different de-differentiated mesenchymal cells have similar or identical  
33 differentiation capacities *in vitro*.

34 **Methods**

35 Chondrocytes isolated from patients with late-stage osteoarthritis were cultured for  
36 several passages until de-differentiation was completed. The mRNA level of cartilage  
37 markers was investigated, and the adipogenic, osteogenic and chondrogenic  
38 differentiation capacity was examined. By adding 5-aza-2'-deoxycytidine (5-aza-dC)  
39 to the media, the influence of DNA methylation on the differentiation capacity was  
40 analyzed.

41 **Results**

42 The chondrocytes used in this work were not affected by the loss of specific gene  
43 expression upon cell culture. The mRNA levels of SOX5, SOX6, SOX9, aggrecan, and  
44 proteoglycan-4 remained unchanged. The underlying mechanisms of cartilage marker  
45 maintenance in osteoarthritic (OA) chondrocytes were investigated with a focus on the  
46 epigenetic modification by DNA methylation. The treatment of de-differentiated  
47 chondrocytes with the DNA methyltransferase inhibitor 5-aza-2'-deoxycytidine (5-aza-  
48 dC) displayed no appreciable impact on the observed maintenance of marker gene  
49 expression, while the chondrogenic differentiation capacity was compromised. On the  
50 other hand, the pre-cultivation with 5-aza-dC improved the osteogenesis and

51 adipogenesis of OA chondrocytes. Contradictory to these effects, the DNA methylation  
52 levels were not reduced after treatment with 1  $\mu$ M 5-aza-dC for four weeks.

### 53 **Conclusion**

54 Chondrocytes isolated from late-stage osteoarthritic patients represents a reliable cell  
55 source for *in vitro* studies as wells as disease models since the chondrogenic  
56 differentiation potential remains. 5-aza-2'-deoxycytidine could not further improve their  
57 chondrogenic potential.

58

### 59 **Background**

60 In multicellular organisms, the loss of environmental signals occurring during injuries  
61 leads to a stepwise reprogramming or de-differentiation of cells. On the other hand,  
62 cell fates are stabilized by epigenetic modifications as found in histone tail marks or  
63 DNA methylations. In this context, tissue-dependent differentially methylated regions  
64 (T-DMR) can be identified in differentiated cells. These cell type specific sequences  
65 are de-methylated in the regarding tissue and associated with active histone marks,  
66 while in other tissues these sequences are transcriptionally inactivated by methylation  
67 [1]. Therefore, the methylation status of key regulatory sequences represents a crucial  
68 factor for differentiation processes as well as cell phenotype maintenance and should  
69 be taken into consideration for successful regenerative applications [2,3]. The  
70 enzymes responsible for the DNA methylation are encoded by the genes DNMT1,  
71 DNMT3a, and DNMT3b (DNA methyltransferases). However, for cellular development,  
72 the introduction, as well as the removal of DNA modifications, are necessary. So far,  
73 no *in vivo* mechanism of direct DNA de-methylation is described, nevertheless  
74 modified intermediates as 5-hydroxymethylcytosine, 5-formylcytosine and 5-

75 carboxylcytosine have been found [4]. These further modifications of 5mC (5-  
76 methylcytosine) are catalyzed by the TET family (ten-eleven translocation).

77 Caused by the withdrawal of tissue specific microenvironmental cues, cells de-  
78 differentiate upon *in vitro* cell culture, reflecting the loss of tissue specificity. The de-  
79 differentiation process of isolated human chondrocytes affects the epigenetic pattern  
80 of the cells on DNA methylation and histone modification level [5,6]. Alterations in DNA  
81 methylation are also identified in comparative studies of healthy chondrocytes with  
82 cells from osteoarthritic tissues [7,8].

83 Osteoarthritis (OA) is the most common disease of the osteochondral unit. OA is  
84 characterized by loss of permanent cartilage, reduced joint spaces, osteophyte  
85 development, subchondral bone cyst formation, and sclerosis. To compensate for the  
86 loss of matrix integrity, clusters of proliferating chondrocytes emerge in early  
87 osteoarthritic cartilage. The proliferation of hitherto resting articular chondrocytes is  
88 initiated by changes in the environment of the pericellular matrix (PCM). The disruption  
89 of the connection between chondrocytes and their PCM compromise the HA-CD44  
90 signaling (hyaluronan and its receptor) and results in the up-regulation of MMPs with  
91 a decreased survival of cells [9]. With disease progression, fissures in the cartilage  
92 ECM can be detected. The degradation leads to an increase in oxygen tension that  
93 further accelerates the process of tissue destruction. Subsequently, the subchondral  
94 bone layer is affected, marked by tissue mass reduction. Furthermore, the subjacent  
95 calcified layer expands into the articular zone, and tissue vascularization is induced in  
96 late OA stages. The disease does not only affect the osteochondral unit of the joint but  
97 also the ligaments and the synovium [10]. Pharmaceutical intervention is the only  
98 option for patients to reduce pain since OA is not curable. In late state OA, the  
99 replacement of the joint by surgery is the only option for patients. Tissue

100 engineering applications provide a promising strategy to regenerate the damaged  
101 tissues. In these technologies, the de-differentiation process is reversed by the  
102 cultivation of de-differentiated cells or stem cells in appropriate conditions capable of  
103 inducing the desired differentiation [11]. The cultivation conditions are oriented towards  
104 the *in vivo* process of chondrocyte differentiation and cartilage development by  
105 endochondral ossification [12]. The process of endochondral ossification is initiated by  
106 condensation of mesenchymal stem cells following differentiation steps of proliferative  
107 chondrocytes, hypertrophic chondrocytes and subsequent bone formation [13]. In  
108 parallel, articular cartilage differentiation and joint formation are regulated in a precise  
109 orchestrated developmental process [14]. For both, the differentiation of articular  
110 chondrocytes and the differentiated cartilage tissue, sets of marker molecules are well  
111 described. These sets include transcription factors like SOX5 and SOX9, signaling  
112 molecules from FGF-, BMP- and WNT-family as well as matrix molecules like collagen  
113 type 2 and aggrecan [13,15].

114 The molecules 5-azacytosine (5-aza) and 5-aza-2'-deoxycytosine (5-aza-dC) were  
115 first synthesized in 1964 [16] and have FDA approval for myelodysplastic syndrome  
116 treatment since 2004 and 2006, respectively. This base is a modification of cytosine,  
117 replacing the carbon at position 5 by nitrogen. This small alteration inhibits the  
118 functionality of DNA methyltransferases (DNMTs) by forming an irreversible covalent  
119 bond between the DNMT and the 5-aza-dC incorporated DNA strand [17]. Hence, the  
120 incorporation of 5-aza-dC into the DNA leads to a decreasing amount of functional  
121 DNMTs in the nucleus. It is reported by Cameron, Bachman, Myöhänen, Herman, &  
122 Baylin, (1999) and many others that cell lines treated with 5-aza-dC led to a decrease  
123 in DNA methylation and expression of formerly repressed genes.

124 To assess the impact on regenerative applications, we analyzed the influence  
125 of a DNMT inhibitor on chondrocytes isolated from patients with late-stage OA. The  
126 differentiation potential towards adipogenic, osteogenic and chondrogenic lineages  
127 was tested, and DNA methylation levels for specific target sites were analyzed.

128

## 129 **Methods**

### 130 **Cell culture**

131 Cartilage was extracted from hip and knee replacements surgeries of OA patients.  
132 Samples were isolated from non-weight bearing sections with no visible lesions.  
133 Human chondrocytes are the sole cellular component in articular cartilage. Therefore,  
134 no sorting strategy was necessary. The extracted cartilage was washed twice with PBS  
135 and shortly with 80% (v/v) ethanol followed by PBS and dissected from the underlying  
136 bone. The tissue was cut in small 2 mm x 2 mm pieces using a scalpel.

137 The pieces were digested with 1 mg/ml protease K (Sigma Aldrich) for 30 min, washed  
138 in PBS and digested in collagenase (2 mg/ml) overnight. A 70  $\mu$ M cell strainer was  
139 used to remove the extracellular matrix debris from the cells. Chondrocytes were  
140 counted and  $5 \times 10^5$  cells were lysed for nucleic acid isolation. All remaining cells were  
141 seeded in a T25 cell culture flask for adherent growth using DMEM with 10 % FBS and  
142 1% penicillin/streptomycin. Chondrocytes were passaged at 80% confluence. For  
143 experiments cells were used at passage 4 to passage 13. Even at late passages, no  
144 indications of senescence were found.

### 145 **AZA treatment**

146 Non-confluent adherent cells were treated with 0.5  $\mu$ M to 10  $\mu$ M 5-aza-dC (100 mM  
147 stock solution in 25% acetic acid) in growth medium for a minimum of 3-4 weeks. Fresh

148 5-aza-dC was added every 24h, while the complete medium exchange was performed  
149 every other day.

#### 150 Osteogenic differentiation

151 Cells were seeded in 6-well plates ( $2.5 \times 10^5$ /well) and media was changed to  
152 osteoblast inducing conditions by adding 10 mM beta-glycerophosphate, 10 nM  
153 cholecalciferol (vitamin D3), 100  $\mu$ M ascorbate phosphate and 10 mM dexamethasone  
154 in final concentrations for 28 days. The medium was changed every other day.  
155 Differentiation was visualized by Alizarin Red staining and confirmed with qPCR by  
156 testing mRNA level for osteopontin (OPN).

#### 157 Alizarin Red staining

158 The medium was carefully aspirated from cell culture wells and washed twice with  
159 dH<sub>2</sub>O. Alizarin Red solution (2% in dH<sub>2</sub>O at pH 4.1-4.3) was applied to the wells and  
160 incubated at room temperature for 5-10 minutes. The staining solution was removed  
161 carefully, and wells were gently washed twice with dH<sub>2</sub>O. Pictures were taken  
162 immediately.

#### 163 Adipogenic differentiation

164 Cells were seeded in 6-well plates ( $2.5 \times 10^5$ /well), and media was changed to  
165 adipogenic inducing conditions by adding 10  $\mu$ g/ml insulin, 500  $\mu$ M 3-isobutyl-1-  
166 methylxanthine, 0.2 mM indomethacin and 1  $\mu$ M dexamethasone in final  
167 concentrations for 28 days. The medium was changed every other day. Differentiation  
168 was visualized by Oil Red O staining and confirmed with qPCR by testing mRNA level  
169 for fatty acid binding protein 4 (FABP4).

#### 170 Oil Red O staining

171 For visualizing lipid vesicles in the cells, the media was removed, and cells were gently  
172 washed with PBS. Cells were fixed in 10% formalin for 10-30 min. Formalin was

173 removed, and wells were washed using PBS first and 60 % isopropanol last. Afterward,  
174 the wells were emptied to dry completely. Three parts of the Oil Red O stock solution  
175 (3% in isopropanol) were mixed with 2 parts of dH<sub>2</sub>O before staining to prepare the  
176 staining solution. After 10 min, the working solution was filtered and added to the dried  
177 wells for 10 min. The staining solution was removed, and cells were gently washed  
178 four times with dH<sub>2</sub>O and drying needed to be prevented. Staining was examined under  
179 the microscope and pictures were taken.

### 180 Chondrogenic differentiation

181 Cells were seeded in a 24-well ultra-low attachment plate (10<sup>6</sup> cells/well, Corning) in  
182 DMEM supplemented with 10 % FBS and 1% penicillin/streptomycin. During this  
183 cultivation step, the cells undergo mesenchymal condensation forming one self-  
184 organized aggregate. After condensation is completed (1-2 weeks), media was  
185 changed to chondrogenic conditions using serum-free DMEM (1 %  
186 penicillin/streptomycin) with 100 nM dexamethasone, 200 nM ascorbate phosphate,  
187 40 µg/ml L-proline, 100 µg/ml sodium pyruvate, 1 % ITS-Premix and 10 ng/ml TGF-  
188 beta-3 (PromoKine) in final concentrations for 4 weeks. The media was changed 3  
189 times a week. Differentiation was visualized after cryosectioning by proteoglycan  
190 staining with Alcian blue and Safranin O / Fast green on glass slides. The expression  
191 of collagen type II chain α1 (COL2A1) and aggrecan (ACAN) was further confirmed by  
192 qPCR and glycosaminoglycan content was determined.

### 193 Cryosections

194 Cell condensates were embedded in O.C.T Compound (Tissue-Tek) and snap frozen  
195 and stored at -80 °C. Tissue was cut at -16 to -18 °C using a specialized knife for hard  
196 tissues and 8 µm sections were placed on glass slides (Histobond, Marienfeld,  
197 Germany) After drying, slides were stored at -20 °C. For RNA extraction samples were



198 cut at a thickness of 25-30  $\mu\text{m}$  and were collected in 2 ml centrifuge tubes. 1 ml QIAzol  
199 (Qiagen, Germany) was added, and RNA samples were stored at - 80 °C until  
200 extraction.

#### 201 Alcian blue staining

202 Sample slides were thawed at room temperature for 30 min and then fixed in 10%  
203 formalin for 10 min. After fixation was completed slides were brought to dH<sub>2</sub>O and then  
204 incubated in 3 % acetic acid for 3 min. Alcian blue staining using 1% Alcian blue 8G  
205 (Sigma Aldrich) in 3% acetic acid at pH 1.5-2.5 for 15-20 min was followed. Slides were  
206 washed in water than dehydrated and mounted. Glycosaminoglycans (GAG) were  
207 stained in turquoise to light blue.

#### 208 Safranin O / Fast green staining

209 Sample slides were thawed at room temperature for 30 min and then fixed in 10%  
210 formalin for 10 min. Slides were stained for 10 min in freshly mixed Weigert's iron  
211 hematoxylin solution (Roth). To differentiate the color slides were washed in running  
212 tap water for 10 min. Nuclear counterstain was performed by adding slides to Fast  
213 green solution (0.05% in dH<sub>2</sub>O) for 5 min. Sections were shortly (10 sec) rinsed with  
214 1% acetic acid and then stained with Safranin O (0.1% in dH<sub>2</sub>O) for 5 min. Slides were  
215 dehydrated and mounted. Glycosaminoglycans were stained in red, nuclei in black and  
216 cytoplasm in light green.

#### 217 GAG measurement

218 The content of glycosaminoglycans (GAG) was measured using DMMB staining (1,9  
219 dimethyl methylene blue). Therefore, condensates were first digested overnight at  
220 56°C in 700  $\mu\text{l}$  digestion buffer (50 mM Tris-HCl, 10 mM Na Cl, 3 mM MgCl<sub>2</sub>, 1% Triton  
221 X 100 at pH 7,9) containing proteinase K (50 ng/ml). The Digestion was stopped at 90  
222 °C for 20 min. The sample was divided in half. One volume of 350  $\mu\text{l}$  was used to

223 isolate genomic DNA (Macherey Nagel, NucleoSpin Tissue Kit) the other half was  
224 further processed by digesting DNA with 3 units of DNase I at 37 °C overnight. The  
225 sample was centrifuged at 13,000 xg for 20 min, and the supernatant was divided into  
226 three samples of 100 µl each. 1 ml of DMBB solution (0.0016% DMBB, 5% EtOH, 0.2  
227 M GuHCl, 0,2 % sodium formate and 0.2% formic acid, adjusted to pH 1.5 with HCl)  
228 was added to each 100 µl sample and were incubated for 30 min on shaker. The color  
229 complex was pelleted by centrifuging at 12,000 xg for 10 min. The supernatant was  
230 removed, and the pellet was resuspended on a shaker for 30 min by adding 300 µl  
231 DMBB de-complexation solution (4 M GuHCL in 50 mM sodium acetate (pH 6.8) +  
232 10% 1-propanol). OD at 656 nm was measured in triplicates. Standard series of  
233 chondroitin sulfate in DMBB de-complexation solution (0-60 µg/ml) was performed for  
234 quantification. Column isolated DNA was quantified spectrometrically with the  
235 NanoDrop2000 (Thermo Scientific, USA) and glycosaminoglycan values were  
236 presented as ratio normalized to DNA content of related samples.

#### 237 RNA isolation

238 Adherent cells were lysed directly on the plate or after collection. Total RNA was  
239 extracted and purified using Nucleospin RNA II Kit (Macherey-Nagel, Germany)  
240 according to manufacturer protocol. For RNA isolation from cell condensates, samples  
241 were snap frozen and cut in 25-30 µm sections before lysis. Sections were transferred  
242 to 1 ml QIAzol (Qiagen) and stored at -80 °C until isolation. Phenol/chloroform  
243 extraction of total RNA was performed. RNA pellets were resuspended in 20-60 µl  
244 RNase free water depending on pellet size. RNA content was measured  
245 spectrometrically at 260 nm using NanoDrop2000 (Thermo Scientific, USA).

#### 246 Genomic DNA isolation

247 Genomic DNA was extracted with the NucleoSpin Tissue Kit (Macharey Nagel)  
248 according to the manufacturer's protocol. DNA was eluted in 60 µl dH<sub>2</sub>O measured  
249 spectroscopically and stored at -20 °C.

250 Bisulfite sequencing of PECAM promoter

251 500 ng of genomic DNA was bisulfite converted using EZ DNA Methylation Gold Kit  
252 (Zymo Research Europe, Germany). The Sequence of the proximal promoter of  
253 PECAM was obtained from the UCSC genome browser (human genome assembly  
254 hg18). All cytosine bases not in a CpG dinucleotide context were converted to thymine  
255 in a text editor, and PCR primer were designed on the converted template using the  
256 primer3 software [19,20]. The PCR product was spanning the promoter from -164 bp  
257 to +285 bp regarding transcriptional start.

258 Proliferation assay

259 Cells were harvested by trypsinization, washed twice with PBS and prepared in a cell  
260 density of  $2 \times 10^6$  cells/ml. A 2X CFDA-SE (10 µM) working solution was prepared.  
261 Equal volumes of cell suspension and the 2X working solution was mixed and  
262 incubated for 7 min at room temperature away from light. Labeling was stopped by  
263 adding 5 volumes of cold growth medium and incubation of 5 min on ice in the dark  
264 followed. Cells were centrifuged and washed twice with growth medium and then  
265 seeded in desired density to perform the assay. For the non-proliferating control cells  
266 were seeded at a high density to exclude cell proliferation by contact inhibition. Other  
267 wells were seeded at 20 % confluence to monitor cell doublings and were treated with  
268 0.5 to 5 µM 5-aza-2'-deoxycytidine (Sigma Aldrich).

269

270 cDNA synthesis and quantitative PCR

271 200 ng total RNA was reverse transcribed using the TaqMan kit (Thermofisher). The  
272 cDNA level was analyzed on MxPro3005 (Agilent Technologies) using SensiFast  
273 SYBR No-ROX Kit (Bioline, UK), 1  $\mu$ l cDNA and 250 nM each primer. Quantitative  
274 PCR (qPCR) was done using the following thermal profile: 95 °C for 2 min, then 40  
275 cycles of 12 sec at 95 °C, 7 sec at 64 °C and 3 sec at 72 °C with additional melt point  
276 analysis. Gene expression was calculated using an amplification efficiency (E) of 1.95  
277 and values were normalized on reference gene UBE2D2 (NM\_181838) expression.

### 278 Statistics

279 For statistical analysis, the students t-test was performed and differences in expression  
280 called significant for p-values  $< 0.05 = *$  ( $< 0.01 = **$ ,  $< 0.001 = ***$ ,  $< 0.0001 = ****$ ).  
281 Dependent on experimental set-up paired or un-paired t-tests were performed.

282

### 283 Results

284 Primary chondrocytes de-differentiate upon isolation from articular cartilage  
285 characterized by a morphological transition from round to fibroblastoid shape.  
286 Interestingly, the impact on marker molecule expression seems to be bivalent (Fig 1).  
287 Although both tested isoforms of transcription factor SOX5 were down-regulated and  
288 the ECM molecule encoded by COL2A1 was not even detectable after cultivation, the  
289 mRNA levels for the cartilage-specific markers SOX6, SOX9, ACAN and PRG4  
290 (proteoglycan 4) were unaffected after several weeks of cultivation.

291 The impact of DNA methylation on marker gene expression was assessed by treating  
292 cultivated chondrocytes with the DNMT inhibitor 5-aza-2'-deoxycytidine. The treatment  
293 with 1  $\mu$ M 5-aza-dC did not alter the expression of SOX5L (isoform b), SOX6, SOX9,  
294 PRG4, and ACAN. Only SOX5M (isoform a) was further down-regulated after 5-aza-

295 dC administration. COL2A1 was not re-expressed after the treatment with the DNMT  
296 inhibitor (Fig 1).

297 Articular chondrocytes do not proliferate in their natural environment, but the cells re-  
298 enter the cell cycle after isolation and *in vitro* cultivation. Significant proliferation  
299 inhibition in chondrocytes was observed in our experiments with as little as 0.5  $\mu$ M 5-  
300 aza-dC in the growth medium with no further gain of the effect between 2 and 5  $\mu$ M 5-  
301 aza-dC after 8 days or 0.5 and 1  $\mu$ M after 16 days of treatment (Fig 2).

302 Upon de-differentiation, the cells regain mesenchymal stromal cell properties like  
303 multiple differentiation potentials. To assess the influence of the DNMT inhibitor  
304 treatment, the capacity for adipogenic, osteogenic and chondrogenic differentiation  
305 was determined in the respective cells. Compared to the untreated control adipogenic  
306 and osteogenic differentiation was further improved by 5-aza-dC treatment (Fig 3 and  
307 4). The staining of the calcified matrix by Alizarin Red as well as lipid vesicles by Oli  
308 Red O staining was positive for both populations after differentiation. However, DNMT  
309 inhibitor treated cells displayed a more pronounced lipid vesicle staining and higher  
310 expression of fatty acid binding protein-4 (FABP4). Furthermore, gene expression of  
311 osteopontin (OPN) showed increased levels after osteogenic differentiation in cells  
312 pre-treated with 5-aza-dC (Fig 4).

313 The most striking difference upon 5-aza-dC administration was observed during  
314 chondrocyte differentiation. Although no changes in cartilage marker expression were  
315 seen after 5-aza-dC treatment (Fig 1), the chondrogenic differentiation capacity was  
316 significantly compromised upon 5-aza-dC treatment (Fig 5). The stimulus of 3D culture  
317 and chondrogenic media was not sufficient to induce proper cartilage matrix formation  
318 (Fig. 5a), and glycosaminoglycan (GAG) content was significantly reduced (Fig 5b).  
319 Furthermore, the coupling of 5-aza-dC expansion with subsequent chondrogenic

320 differentiation reduced the cartilage marker expression (Fig 6). These data strongly  
321 indicate that DNMT inhibition impaired a regulator of cartilage formation, whose activity  
322 is essential for active chondrogenic differentiation and assumedly dispensable for  
323 phenotype maintenance.

324 To assess the effect of DNMT inhibitor treatment on the DNA methylation status, the  
325 global DNA methylation level was determined comprehensively. As seen in Fig 7, even  
326 the long-term treatment of the isolated human OA chondrocytes with 1  $\mu$ M 5-aza-dC  
327 exerted no significant influence on the global methylation level, while the treatment in  
328 HEK293T cells diminished DNA methylation after only 72 h. However, the analysis of  
329 an individual CpG at the site +242 of the PECAM promoter suggests that 5-aza-dC  
330 might act as a concentration-dependent DNMT inhibitor by de-methylation at the  
331 former strongly methylated sequence (Fig 7). To determine possible influences of cell  
332 culture or 5-aza-dC treatment on gene expression of DNA modifying enzymes, the  
333 gene expression of DNMTs were analyzed. The gene expression of DNMT1, DNMT3a,  
334 and DNMT3b was downregulated upon expansion *in vitro* with no further impact by  
335 additional DNMT inhibitor treatment (Fig 8).

336

### 337 **Discussion**

338 Several publications report of de-differentiation and loss of functionality in healthy  
339 chondrocytes upon cell culture [21]. These studies mainly focus on the regenerative  
340 potential of chondrocytes. Even though the cartilage we extracted was from even and  
341 non-injured areas of the joint, the environmental signaling was nevertheless of late-  
342 stage OA and should be taken into consideration.

343 The transcriptional differences of healthy and osteoarthritic chondrocytes were  
344 described repeatedly. In these studies, the loss of cartilage marker expression was

345 reported as shown in down-regulation of collagen type 2, aggrecan and SOX9 coupled  
346 with up-regulation of collagen type 1 [6,21]. Nevertheless, the de-differentiated  
347 chondrocytes showed a high potential for cartilage formation in 3D culture systems. As  
348 shown before, imitating the physiological environment of the tissue without further  
349 assistance was sufficient for the de-differentiated chondrocytes to re-differentiate [22].  
350 We suggest that the chondrocytes of these OA patients had already experienced this  
351 transcriptional change. This could be the simplest explanation for the partial  
352 maintenance of marker expression upon cell culture, assuming the down-regulation  
353 already took place during disease progression (Fig 1). However, Lin et al. showed in  
354 2008 similar gene expression profiles of cultured chondrocytes isolated from healthy  
355 and OA joints, indicating that after completed de-differentiation both chondrocyte  
356 populations were equal [23].  
357 Comparative studies of healthy and OA chondrocytes revealed different DNA  
358 methylation pattern[24]. In our hands, treatment of OA chondrocytes with 5-aza-dC  
359 decreased cell proliferation already at low doses (Fig 2). In 2006, Unterberger et al.  
360 reported the subjacent mechanisms for the proliferation inhibition observed after  
361 DNMT reduction. The dissociation of DNMT1 from the replication fork activates a  
362 replication stress checkpoint in an ATR (ataxia telangiectasia mutated Rad3-related)  
363 dependent manner [25]. Through this mechanism one single incorporated cytosine  
364 analog could stall one replication complex until the missing enzyme is replaced,  
365 explaining the proliferative inhibition effect of small amounts of 5-aza-dC observed in  
366 our culture.  
367 The increased expression of *OPN* and *FABP4* during osteogenic and adipogenic  
368 differentiation after 5-aza-dC treatment (Fig 3 and 4) are in line with the work of Kim et  
369 al., where the chondrogenic, osteogenic and neurogenic differentiation of human bone

370 marrow MSCs was enhanced in the presence of 5-aza-dC [26]. In our hands, the most  
371 significant impact of 5-aza-dC treatment was observed on cartilage differentiation.  
372 Matrix production was reduced, and marker expression was down-regulated for the  
373 first time (Fig 5 and 6). Additionally, the expression of hypertrophic markers was  
374 elevated (Fig 7). These data are contrary to the work of Duan et al. in 2017, where the  
375 treatment of healthy chondrocytes with 5-aza-C could gradually reverse the de-  
376 differentiation of chondrocytes, shown by an increase of cartilage marker *SOX9* and  
377 the decrease of collagen type 1 expression thereby restoring the chondrogenic  
378 phenotype. Duan et al. isolated chondrocytes from trauma patients while chondrocytes  
379 in this work were extracted from late-stage OA joints. Duan et al. used 2  $\mu$ M 5-aza-C  
380 (RNA nucleotide) for 24 hours, while in our lab hands cells were treated for 3 to 4  
381 weeks with 1  $\mu$ M 5-aza-dC (DNA nucleotide). Komashko and Fanham reported the  
382 differences between long- and short-term treatment of 5-aza-C on DNA methylation  
383 and histone modification patterns in 2010. They showed a regulatory effect of the  
384 inhibitor mostly on genes which were already unmethylated before treatment and that  
385 short-term treatment only slightly reduced the DNA methylation of HEK293 cells.  
386 Alvarez-Garcia et al. analyzed in 2016 the influence of short (48 h) and long-term (4-5  
387 weeks) treatment of 5-aza-dC by determining the expression of few tested markers in  
388 chondrocytes, where short-term treatment enhanced the transcription of more genes  
389 compared to long-term stimulus. Epigenetic differences between normal and  
390 osteoarthritic chondrocytes are described by Alvarez-Garcia et al., where the DNA  
391 methylation profiles significantly differ between these two groups [24]. Taken these  
392 findings together, the duration of treatment influences transcription by different  
393 mechanisms, since in short-term treatment the incorporation rate is very low due to the  
394 few numbers of cell doublings during that time frame.



395 The long-term treatment of OA chondrocytes with 5-aza-dC in our lab did not affect the  
396 global DNA-methylation levels (Fig 8). In the work of Hashimoto et al. the incubation  
397 of 5-aza-dC in chondrocytes led to a decrease of DNA methylation of specific CpGs  
398 within the IL1b promoter while global DNA demethylation was not shown [28]. In 2017,  
399 a methylome analysis by NGS performed by Duan et al. illustrated the differences in  
400 DNA methylations of chondrocytes at different passages as well as 5-aza-dC treated  
401 versus untreated cells. Their findings indicate a directed change in DNA methylation,  
402 since most prominently the regions which were hypomethylated by 5-aza-dC, got  
403 hypermethylated upon artificial cell culture. Furthermore, the treatment of 5-aza-dC in  
404 primary healthy chondrocytes indeed de-methylate DNA, but preferably of distinct and  
405 possibly cartilage-specific regions. This was also published for human cancer cell lines  
406 by Hagemann et al., where the DNA de-methylation was found to be non-randomly  
407 and reproducible. They reported that upon treatment with 5-aza-dC specific CpGs  
408 within CpG islands become re-methylated and furthermore they identified sequences  
409 which were never affected by treatment at all [29]. The inhibiting effect of 5-aza-dC on  
410 cartilage marker expression during chondrogenesis is the focus of further  
411 investigations. Whole genome methylation analysis is required to identify the key  
412 player of the observed changes with regards to the duration of treatment.

413 Without fully exploring the mechanisms behind the cartilage marker maintenance in  
414 OA chondrocytes, their beneficial properties represent a helpful tool for *in vitro*  
415 applications and our data are in line with multiple publications, which report that OA  
416 chondrocytes are a source of osteochondroprogenitors and have equal cartilage  
417 formation capacity as healthy chondrocytes [30–33].

418

419 **Conclusion**

420 Chondrocytes isolated from late-stage osteoarthritis do not show the same changes  
421 as healthy chondrocytes during de-differentiation upon cell culture. They can  
422 differentiate towards adipogenic, osteogenic and chondrogenic lineages. The  
423 adipogenic and osteogenic differentiation was further enhanced under long-term  
424 treatment with DNMT inhibitor 5-aza-dC, while the proliferation of cells slowed down.  
425 On the other hand, the chondrogenic differentiation was inhibited. Although the DNMT  
426 inhibitor was added every second day for four weeks during the expansion of cells, no  
427 global DNA de-methylation could be observed, indicating an additional independent  
428 mechanism responsible for the observed effects.

429

#### 430 **List of abbreviations**

|          |                                    |
|----------|------------------------------------|
| 5-aza-C  | 5-aza-cytidine                     |
| 5-aza-dC | 5-aza-2'-deoxycytidine             |
| 5mC      | 5-methyl-cytosine                  |
| ACAN     | aggrecan                           |
| COL2A1   | collagen type II chain alpha 1     |
| DNMT     | DNA methyltransferase              |
| FABP     | fatty acid binding protein         |
| GAG      | glycosaminoglycan                  |
| NGS      | Next generation sequencing         |
| OA       | osteoarthritis                     |
| OPN      | osteopontin                        |
| PRG4     | proteoglycan-4                     |
| UBE2D2   | ubiquitin-conjugating enzyme E2 D2 |

431

432

#### 433 **Declarations**

#### 434 **Ethics approval and consent to participate**

435 The acquisition of cartilage tissue was approved by the Ethics Committee Charité and  
436 all patients gave written consent for this research.

#### 437 **Consent for publication**

438 Not applicable.

#### 439 **Availability of data and materials**

440 All data generated or analyzed during this study are included in this published article  
441 and its supplementary information files.

#### 442 **Competing interests**

443 The authors declare that they have no competing interests.

#### 444 **Funding**

445 Research was funded by the Technische Universität Berlin, Germany

#### 446 **Authors' contributions**

447 SK designed the experimental setting, performed cell culture and analyzed the  
448 results. LRS and OV performed parts of the cell culture as well as the molecular  
449 biological methods. All authors read and approved the final manuscript.

#### 450 **Acknowledgments**

451 We acknowledge support by the German Research Foundation and the Open Access  
452 Publication Funds of TU Berlin

453

#### 454 **References**

- 455 1. Ikegami K, Ohgane J, Tanaka S, Yagi S, Shiota K. Interplay between DNA  
456 methylation, histone modification and chromatin remodeling in stem cells and during  
457 development. *Int J Dev Biol.* 2009;
- 458 2. Rinaldi L, Benitah SA. Epigenetic regulation of adult stem cell function. *FEBS J.*  
459 *Wiley Online Library*; 2015;282:1589–604.

- 460 3. Yamada Y, Haga H, Yamada Y. Concise review: dedifferentiation meets cancer  
461 development: proof of concept for epigenetic cancer. *Stem Cells Transl Med. Wiley*  
462 *Online Library*; 2014;3:1182–7.
- 463 4. Kohli RM, Zhang Y. TET enzymes, TDG and the dynamics of DNA demethylation.  
464 *Nature. Nature Publishing Group*; 2013;502:472.
- 465 5. Duan L, Liang Y, Ma B, Wang D, Liu W, Huang J, et al. DNA Methylation Profiling  
466 in Chondrocyte Dedifferentiation In Vitro. *J Cell Physiol. 2017*;232:1708–16.
- 467 6. Ma B, Leijten JCH, Wu L, Kip M, van Blitterswijk CA, Post JN, et al. Gene  
468 expression profiling of dedifferentiated human articular chondrocytes in monolayer  
469 culture. *Osteoarthr Cartil. England*; 2013;21:599–603.
- 470 7. Barter MJ, Bui C, Young DA. Epigenetic mechanisms in cartilage and  
471 osteoarthritis: DNA methylation, histone modifications and microRNAs. *Osteoarthr*  
472 *Cartil [Internet]. Elsevier Ltd*; 2012;20:339–49. Available from:  
473 <http://dx.doi.org/10.1016/j.joca.2011.12.012>
- 474 8. Im G-I, Choi Y-J. Epigenetics in osteoarthritis and its implication for future  
475 therapeutics. *Expert Opin Biol Ther. England*; 2013;13:713–21.
- 476 9. Pohlig F, Guell F, Lenze U, Lenze FW, Mühlhofer HML, Schauwecker J, et al.  
477 Hyaluronic Acid Suppresses the Expression of Metalloproteinases in Osteoarthritic  
478 Cartilage Stimulated Simultaneously by Interleukin 1 $\beta$  and Mechanical Load. *PLoS*  
479 *One. United States*; 2016;11:e0150020.
- 480 10. Goldring SR, Goldring MB. Changes in the osteochondral unit during  
481 osteoarthritis: structure, function and cartilage-bone crosstalk. *Nat Rev Rheumatol.*  
482 *United States*; 2016;12:632–44.
- 483 11. Doran PM. Cartilage Tissue Engineering: What Have We Learned in Practice?  
484 *Methods Mol Biol. United States*; 2015;1340:3–21.

- 485 12. Ahmed TAE, Hincke MT. Mesenchymal stem cell-based tissue engineering  
486 strategies for repair of articular cartilage. *Histol Histopathol* [Internet]. 2014 [cited  
487 2018 Nov 12];29:669–89. Available from:  
488 <http://www.ncbi.nlm.nih.gov/pubmed/24452855>
- 489 13. Long F, Ornitz DM. Development of the endochondral skeleton. *Cold Spring Harb*  
490 *Perspect Biol. United States*; 2013;5:a008334.
- 491 14. Decker RS, Koyama E, Pacifici M. Genesis and morphogenesis of limb synovial  
492 joints and articular cartilage. *Matrix Biol* [Internet]. 2014 [cited 2018 Nov 6];39:5–10.  
493 Available from: <https://linkinghub.elsevier.com/retrieve/pii/S0945053X14001590>
- 494 15. Goldring MB, Goldring SR. Articular cartilage and subchondral bone in the  
495 pathogenesis of osteoarthritis. *Ann N Y Acad Sci* [Internet]. 2010 [cited 2018 Nov  
496 6];1192:230–7. Available from: [http://doi.wiley.com/10.1111/j.1749-](http://doi.wiley.com/10.1111/j.1749-6632.2009.05240.x)  
497 [6632.2009.05240.x](http://doi.wiley.com/10.1111/j.1749-6632.2009.05240.x)
- 498 16. Christman JK. 5-Azacytidine and 5-aza-2'-deoxycytidine as inhibitors of DNA  
499 methylation: Mechanistic studies and their implications for cancer therapy. *Oncogene*  
500 [Internet]. 2002 [cited 2018 Nov 6];21:5483–95. Available from:  
501 <https://www.nature.com/articles/1205699>
- 502 17. Stresemann C, Lyko F. Modes of action of the DNA methyltransferase inhibitors  
503 azacytidine and decitabine. *Int J Cancer* [Internet]. Wiley-Blackwell; 2008 [cited 2018  
504 Nov 5];123:8–13. Available from: <http://doi.wiley.com/10.1002/ijc.23607>
- 505 18. Cameron EE, Bachman KE, Myöhänen S, Herman JG, Baylin SB. Synergy of  
506 demethylation and histone deacetylase inhibition in the re-expression of genes  
507 silenced in cancer. *Nat Genet* [Internet]. Nature Publishing Group; 1999 [cited 2018  
508 Nov 5];21:103–7. Available from: [http://www.nature.com/articles/ng0199\\_103](http://www.nature.com/articles/ng0199_103)
- 509 19. Koressaar T, Remm M. Enhancements and modifications of primer design

- 510 program Primer3. *Bioinformatics*. England; 2007;23:1289–91.
- 511 20. Untergasser A, Cutcutache I, Koressaar T, Ye J, Faircloth BC, Remm M, et al.  
512 Primer3--new capabilities and interfaces. *Nucleic Acids Res*. England; 2012;40:e115.
- 513 21. Duan L, Ma B, Liang Y, Chen J, Zhu W, Li M, et al. Cytokine networking of  
514 chondrocyte dedifferentiation in vitro and its implications for cell-based cartilage  
515 therapy. *Am. J. Transl. Res*. 2015.
- 516 22. Rosowski M, Falb M, Tschirschmann M, Lauster R. Initiation of mesenchymal  
517 condensation in alginate hollow spheres--a useful model for understanding cartilage  
518 repair? *Artif Organs*. United States; 2006;30:775–84.
- 519 23. Lin Z, Fitzgerald JB, Xu J, Willers C, Wood D, Grodzinsky AJ, et al. Gene  
520 expression profiles of human chondrocytes during passaged monolayer cultivation. *J*  
521 *Orthop Res*. 2008;
- 522 24. Alvarez-Garcia O, Fisch KM, Wineinger NE, Akagi R, Saito M, Sasho T, et al.  
523 Increased DNA Methylation and Reduced Expression of Transcription Factors in  
524 Human Osteoarthritis Cartilage. *Arthritis Rheumatol*. United States; 2016;68:1876–  
525 86.
- 526 25. Unterberger A, Andrews SD, Weaver ICG, Szyf M. DNA methyltransferase 1  
527 knockdown activates a replication stress checkpoint. *Mol Cell Biol* [Internet].  
528 American Society for Microbiology Journals; 2006 [cited 2018 Nov 12];26:7575–86.  
529 Available from: <http://www.ncbi.nlm.nih.gov/pubmed/17015478>
- 530 26. Kim HJ, Kwon Y-RR, Bae Y-JJ, Kim Y-JJ. Enhancement of human mesenchymal  
531 stem cell differentiation by combination treatment with 5-azacytidine and trichostatin  
532 A. *Biotechnol Lett*. Netherlands; 2016;38:167–74.
- 533 27. Komashko VM, Farnham PJ. 5-azacytidine treatment reorganizes genomic  
534 histone modification patterns. *Epigenetics*. Informa UK Limited; 2010;5:229–40.

- 535 28. Hashimoto K, Oreffo ROC, Gibson MB, Goldring MB, Roach HI. DNA  
536 demethylation at specific CpG sites in the IL1B promoter in response to inflammatory  
537 cytokines in human articular chondrocytes. *Arthritis Rheum.* United States;  
538 2009;60:3303–13.
- 539 29. Hagemann S, Heil O, Lyko F, Brueckner B. Azacytidine and decitabine induce  
540 gene-specific and non-random DNA demethylation in human cancer cell lines. *PLoS*  
541 *One.* United States; 2011;6:e17388.
- 542 30. Jiang Y, Tuan RS. Origin and function of cartilage stem/progenitor cells in  
543 osteoarthritis. *Nat Rev Rheumatol.* United States; 2015;11:206–12.
- 544 31. Khan IM, Williams R, Archer CW. One flew over the progenitor’s nest: migratory  
545 cells find a home in osteoarthritic cartilage. *Cell Stem Cell.* United States;  
546 2009;4:282–4.
- 547 32. Koelling S, Kruegel J, Irmer M, Path JR, Sadowski B, Miro X, et al. Migratory  
548 chondrogenic progenitor cells from repair tissue during the later stages of human  
549 osteoarthritis. *Cell Stem Cell.* United States; 2009;4:324–35.
- 550 33. Oda T, Sakai T, Hiraiwa H, Hamada T, Ono Y, Nakashima M, et al.  
551 Osteoarthritis-derived chondrocytes are a potential source of multipotent progenitor  
552 cells for cartilage tissue engineering. *Biochem Biophys Res Commun.* United States;  
553 2016;479:469–75.

554

555

556

557

558

559

560

561

562

563 Figure 1: Gene expression in OA chondrocytes w/o 5-aza-dC treatment.  
564 mRNA levels of *SOX5*, *SOX6*, *SOX9*, *ACAN*, *PRG4* and *COL2A1* normalized on  
565 reference gene expression *UBE2D2*. Cells were cultivated for 4 passages and then  
566 treated with 1  $\mu$ M 5-aza-dC for 4 weeks. Statistical analysis was done using ratio  
567 paired t-test. Values are the mean  $\pm$  SD (n = 10; \*p < 0.05, \*\*p < 0.01, \*\*\*p < 0.001)  
568

569 Figure 2: Inhibitory effect of 5-aza-dC on chondrocyte proliferation.  
570 CFSE labeled chondrocytes were treated with 2 or 5  $\mu$ M 5-aza-dC for 8 days as well  
571 as 0.5 and 1  $\mu$ M for 16 days. Values represent mean fluorescence (normalized on non-  
572 proliferative control). Statistical analysis was done using ratio paired t-test. Values are  
573 the mean  $\pm$  SD (n = 10; \*p < 0.05, \*\*p < 0.01, \*\*\*p < 0.001)  
574

575 Figure 3: Influence of 5-aza-dC on the adipogenic potential of OA chondrocytes.  
576 After 5-aza-dC treatment, OA chondrocytes were differentiated towards adipocytes.  
577 (a) After 4 weeks, lipid vesicles were stained by Oil Red O. (b) Gene expression of  
578 fatty acid binding protein 4 (*FABP4*). Expression was normalized on reference gene  
579 *UBE2D2*. Values are mean  $\pm$  SD and statistical analysis was done using paired ratio  
580 t-test. (n  $\geq$  4; \*p < 0.05, \*\*\*\*p < 0.0001)  
581

582 Figure 4: Influence of 5-aza-dC on the osteogenic potential of OA chondrocytes.  
583 After 5-aza-dC treatment, OA chondrocytes were differentiated towards osteoblast.  
584 (a) After 4 weeks, calcified matrix was stained by Alizarin Red. (b) Gene expression  
585 of osteopontin (*OPN*) was measured and normalized on reference gene *UBE2D2*.  
586 Values represent mean  $\pm$  SD and statistical analysis was done using paired ratio t-  
587 test. (n  $\geq$  4; \*p < 0.05, \*\*p < 0.01, \*\*\*p < 0,001)



588

589 Figure 5: Effect of 5-aza-dC on cartilage matrix formation.

590 After 5-aza-dC treatment, OA chondrocytes were differentiated towards cartilage for 6  
591 weeks in 3D culture. (a) Frozen sections were stained for proteoglycans with Alcian  
592 Blue and Safranin O / Fast Green. (b) Glycosaminoglycan content was normalized on  
593 DNA amount of the same sample. Values represent mean  $\pm$  SD and statistical analysis  
594 was done using paired ratio t-test. (n = 3; \*p < 0.05)

595

596 Figure 6: Influence of 5-aza-dC on cartilage marker expression.

597 After 5-aza-dC treatment, OA chondrocytes were differentiated towards cartilage. After  
598 6 weeks, gene expression of cartilage markers was measured and normalized on  
599 reference gene *UBE2D2*. Values represent mean  $\pm$  SD and statistical analysis was  
600 done using paired ratio t-test. (n  $\geq$  4; \*p < 0.05, \*\*p < 0.01)

601 Figure 7: Global DNA methylation level in OA chondrocytes.

602 (a) ELISA of 5mC in OA chondrocytes after 4 weeks of 5-aza-dC treatment. (b) Bisulfite  
603 sequencing of CpG at +242 of *PECAM* promoter after 4 week of 5-aza-dC exposure.  
604 (c) ELISA of 5mC in HEK293T cells after 72h of 5-aza-dC treatment. Values represent  
605 mean  $\pm$  SD and statistical analysis was done using student t-test. (n = 4; \*p < 0.05)

606

607 Figure 8: Gene expression of DNA methyltransferases *DNMT1*, *DNMT3A* and  
608 *DNMT3B*.

609 Transcription level in isolated OA chondrocytes was compared with de-differentiated  
610 w/o 5-aza-dC treatment (4 weeks). Expression was normalized on reference gene  
611 *UBE2D2*. Statistical analysis was done using ratio paired t-test. Values represent mean  
612  $\pm$  SD (n  $\geq$  4; \*p < 0,05)

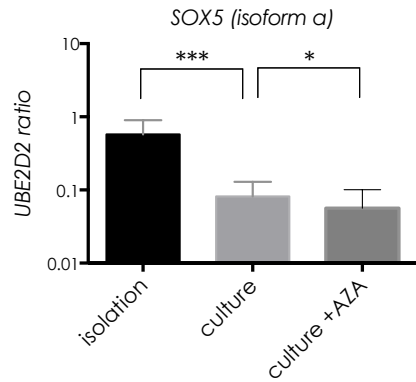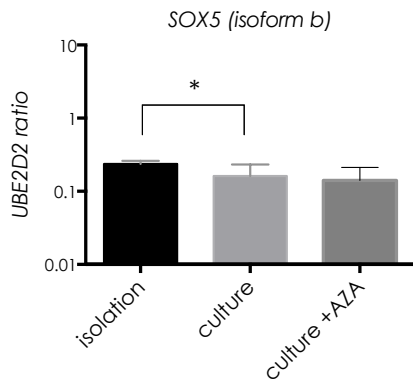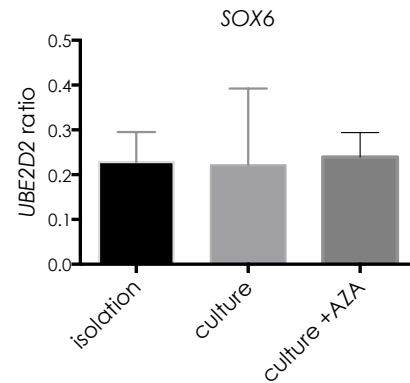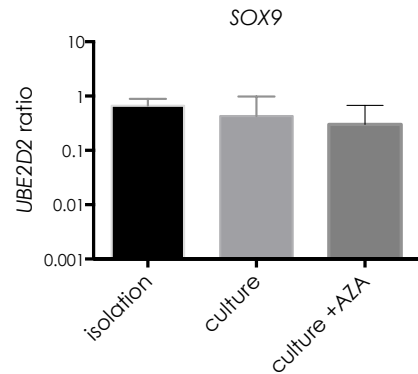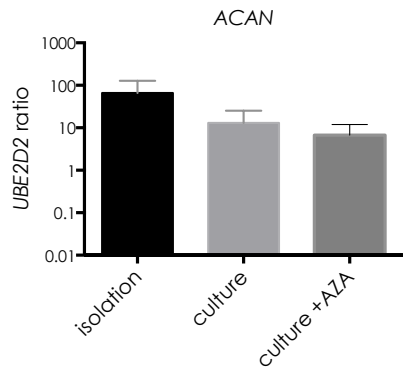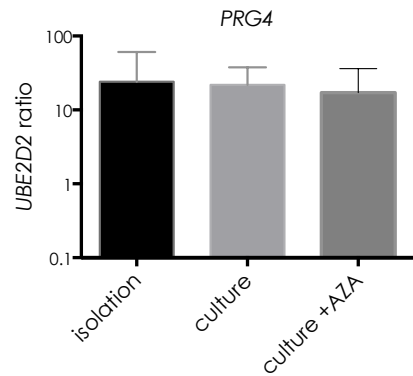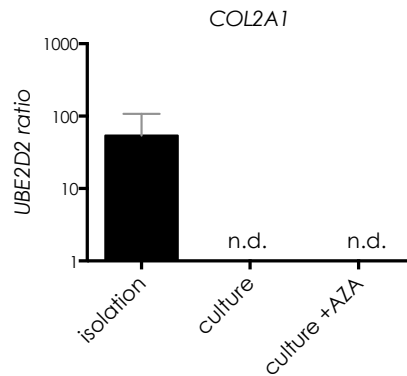

8 days

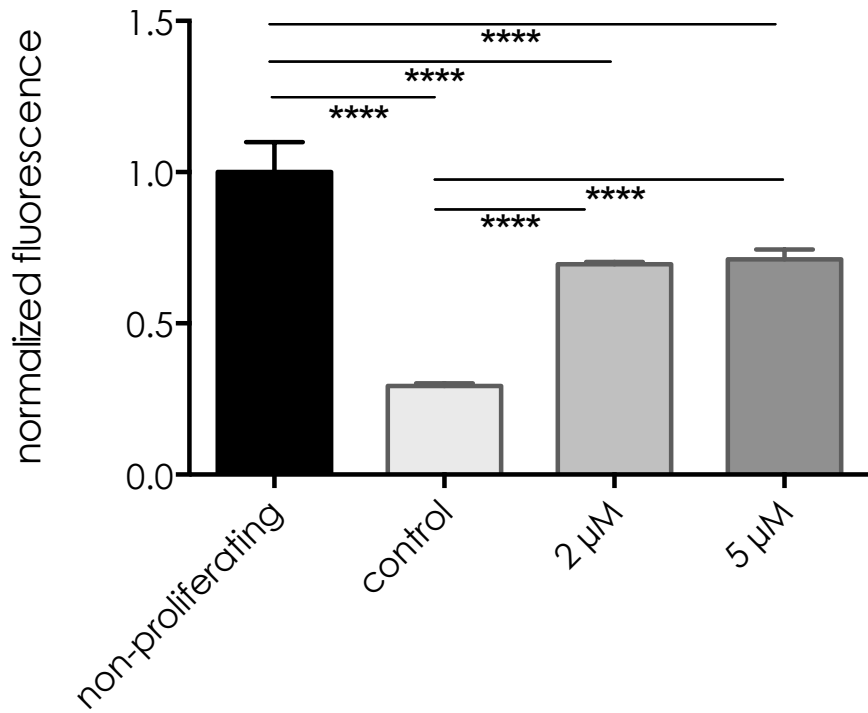

16 days

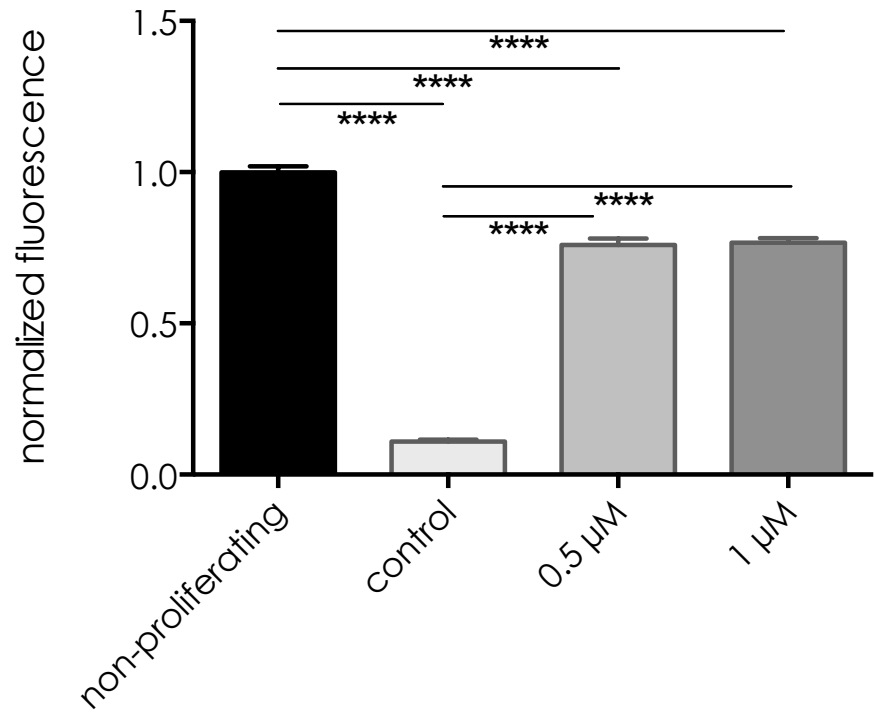

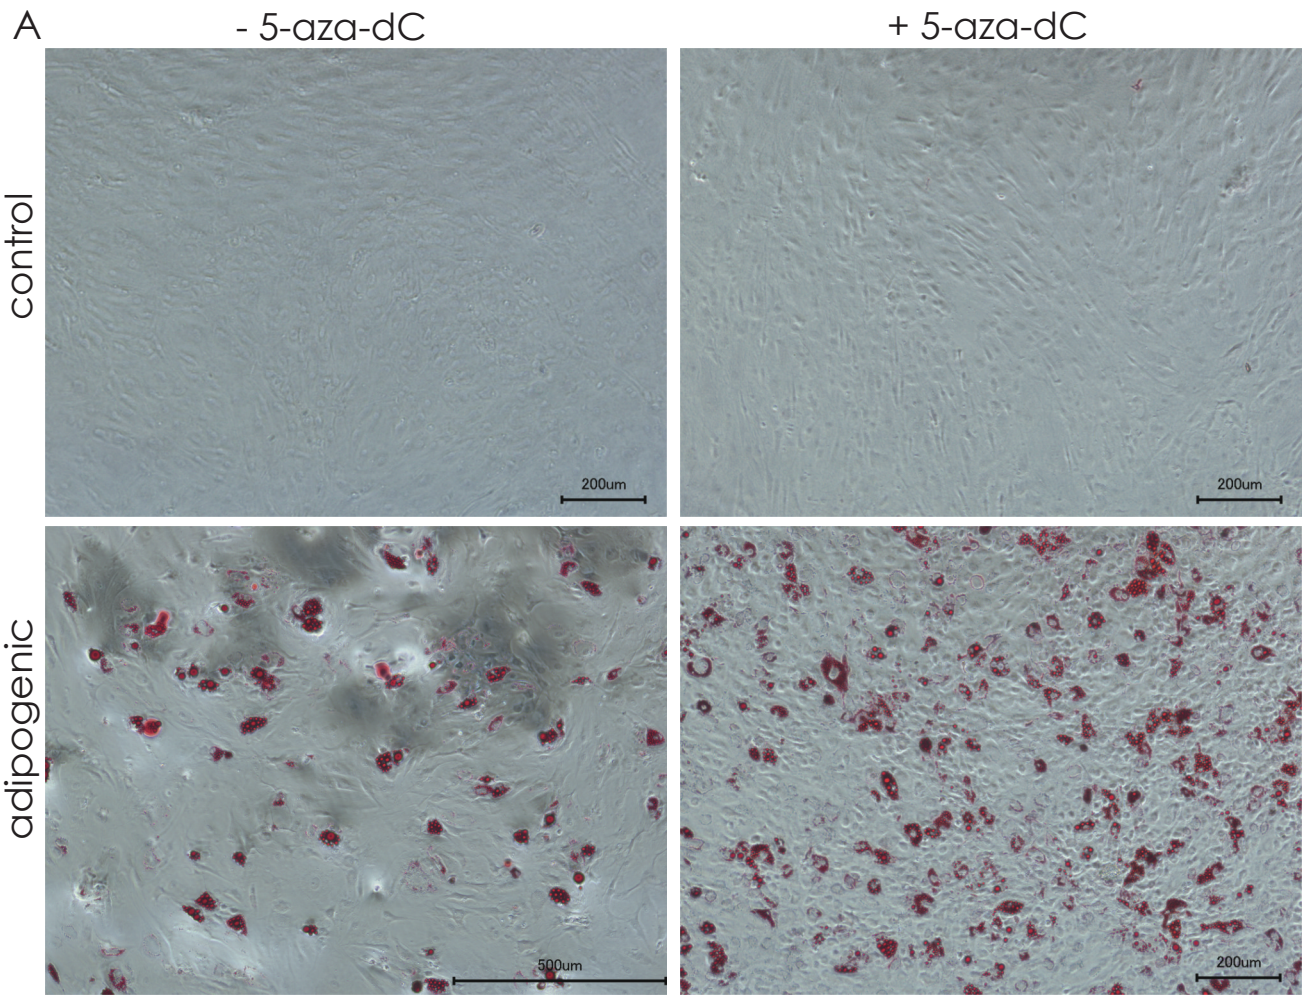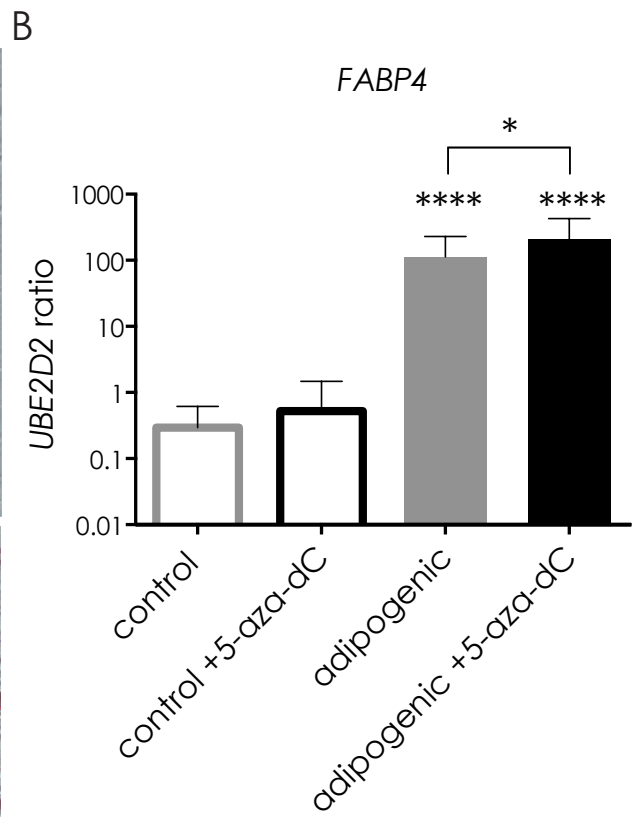

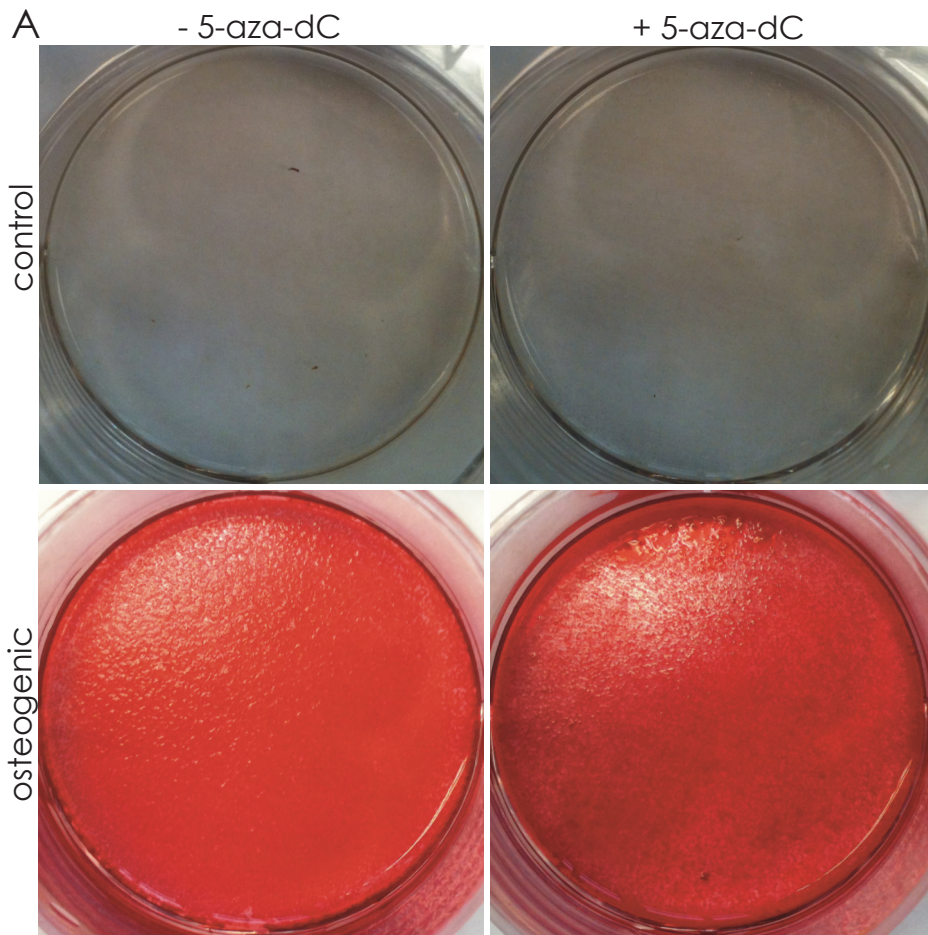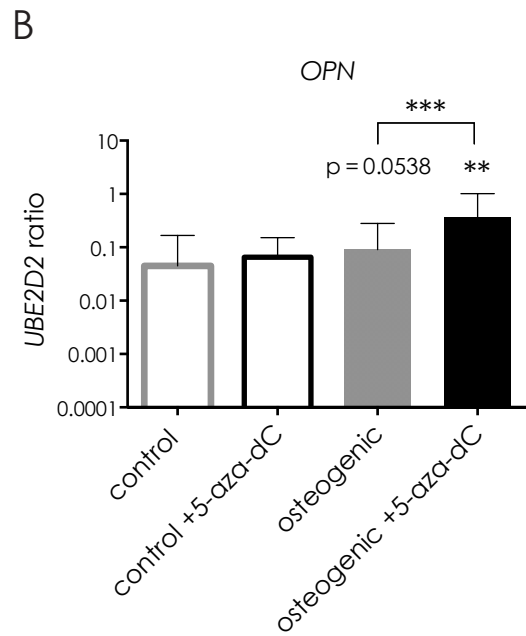

A

- 5-aza-dC

+ 5-aza-dC

Safranin O / Fast Green

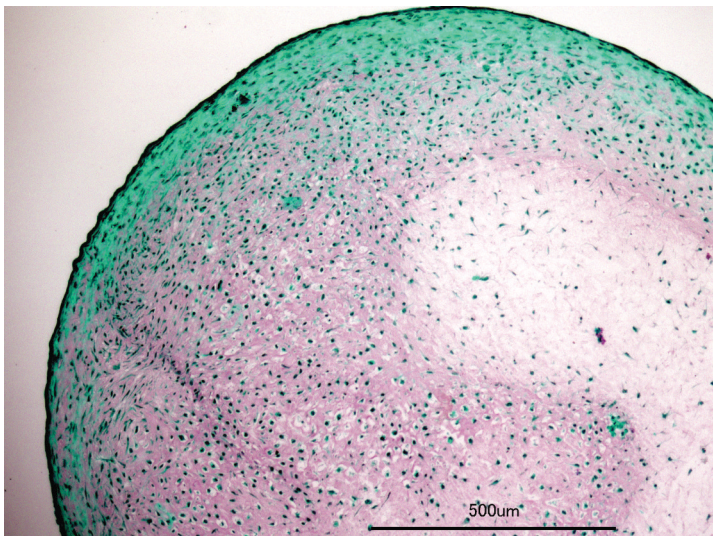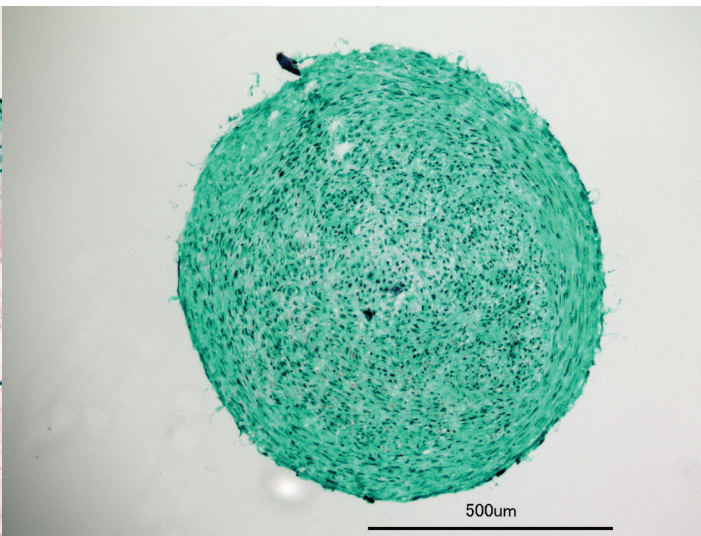

Alcian Blue

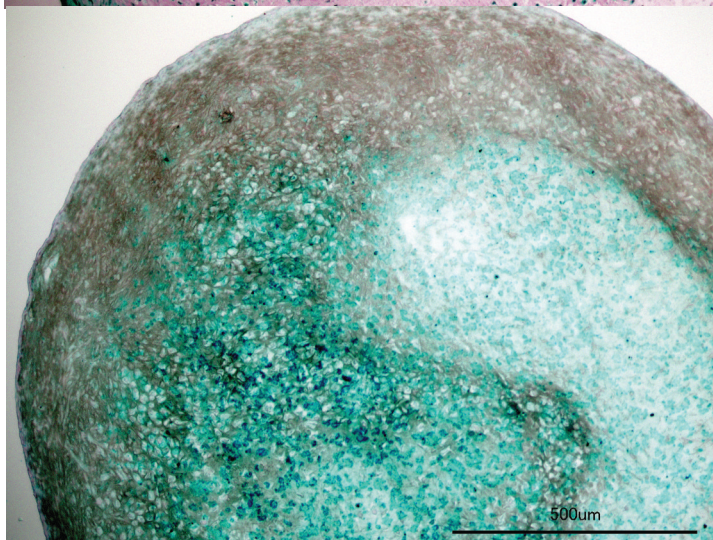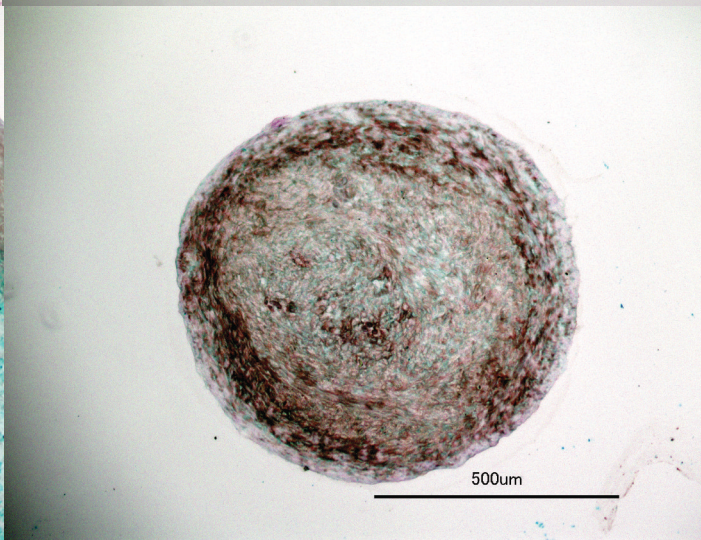

B

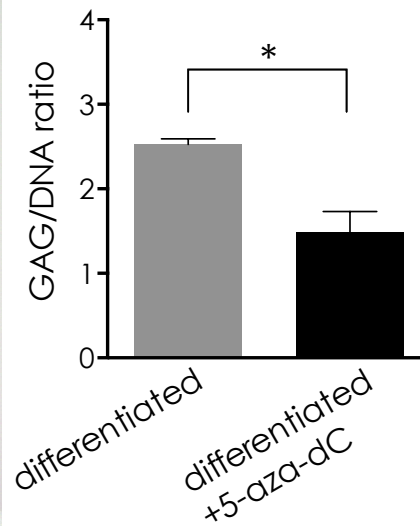

SOX5L

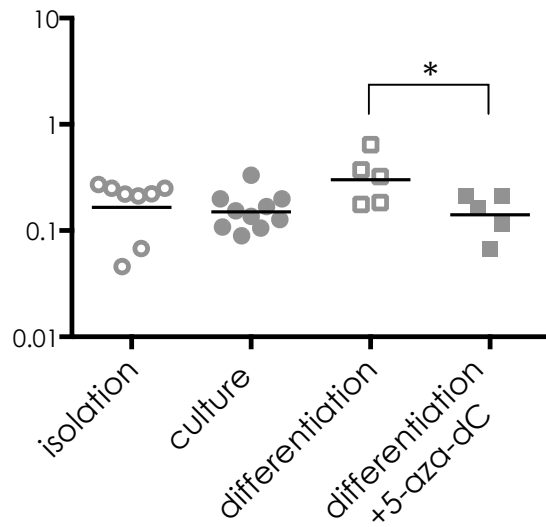

SOX6

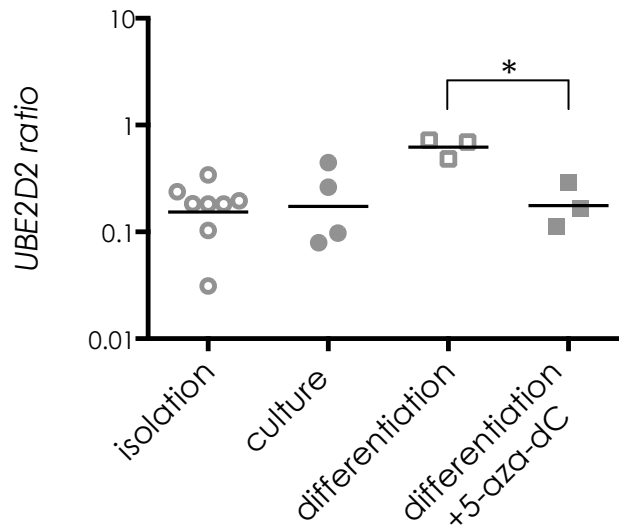

SOX9

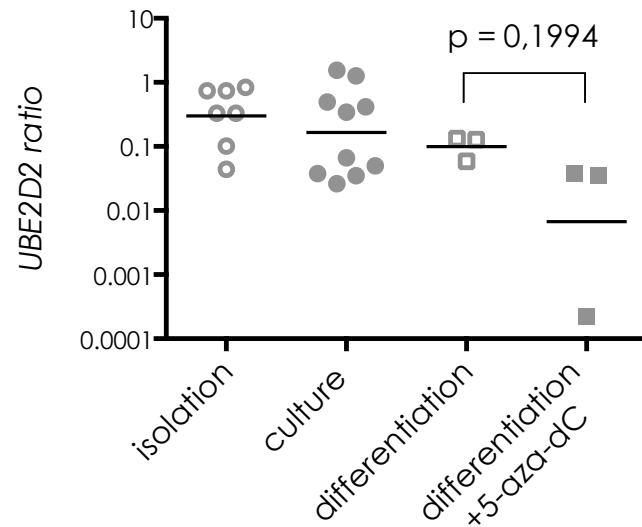

ACAN

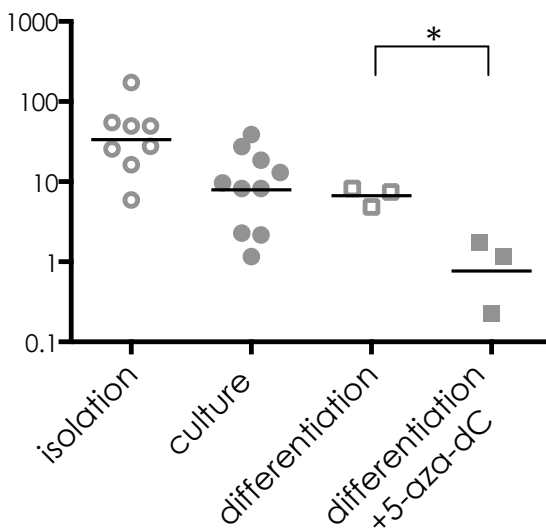

PRG4

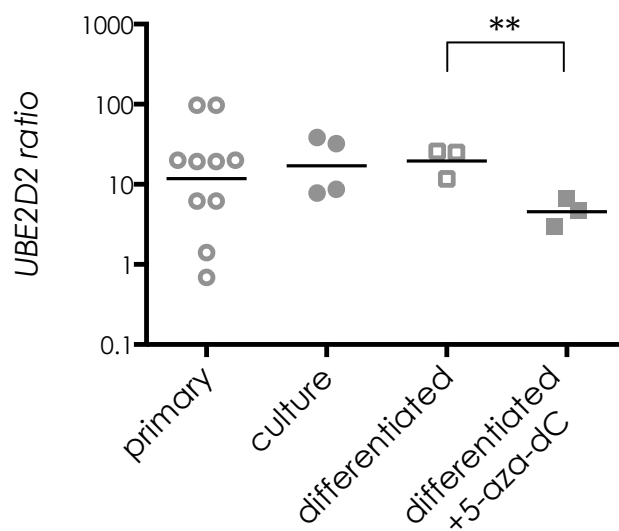

COL2A1

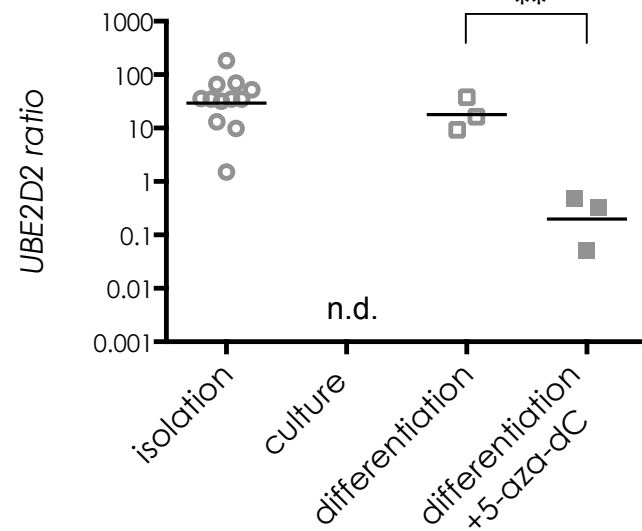

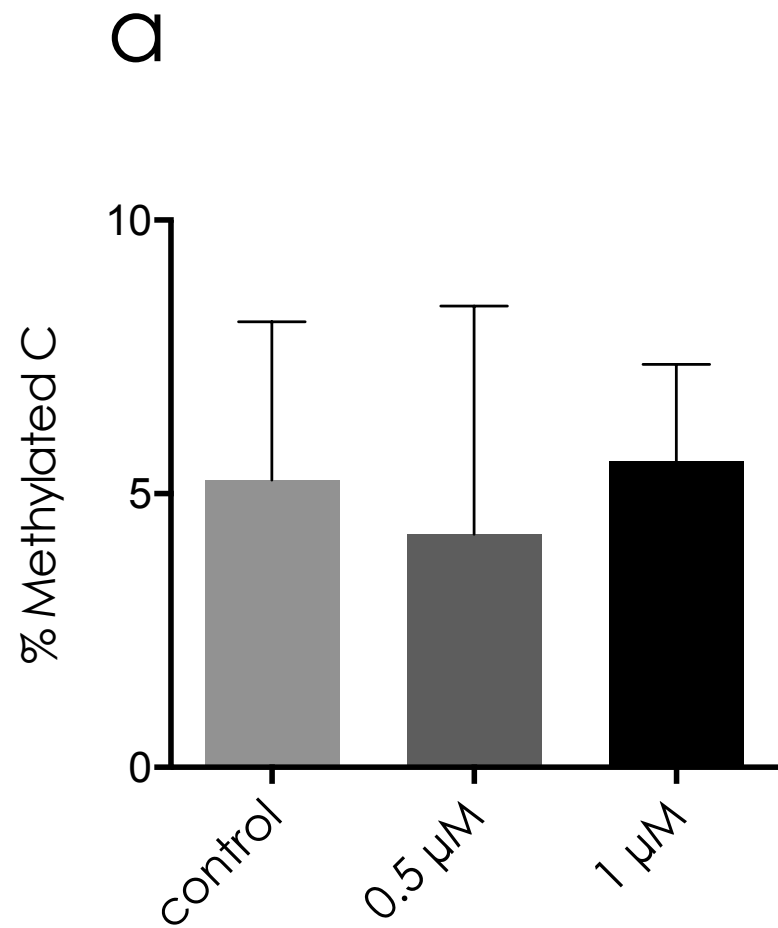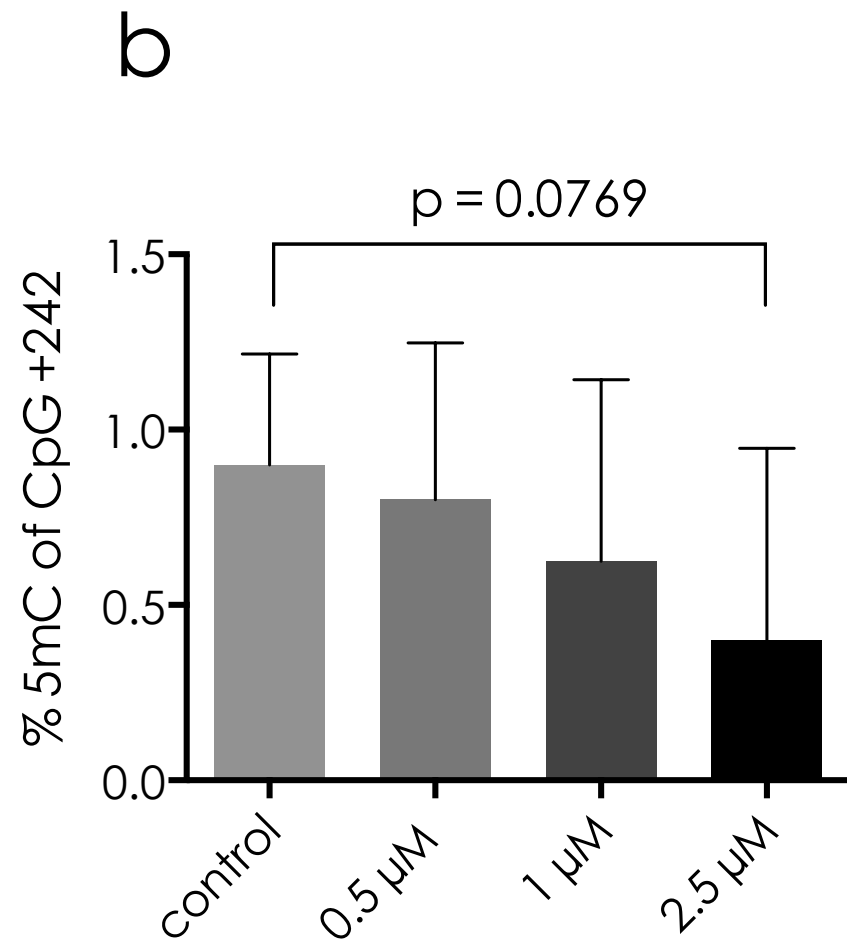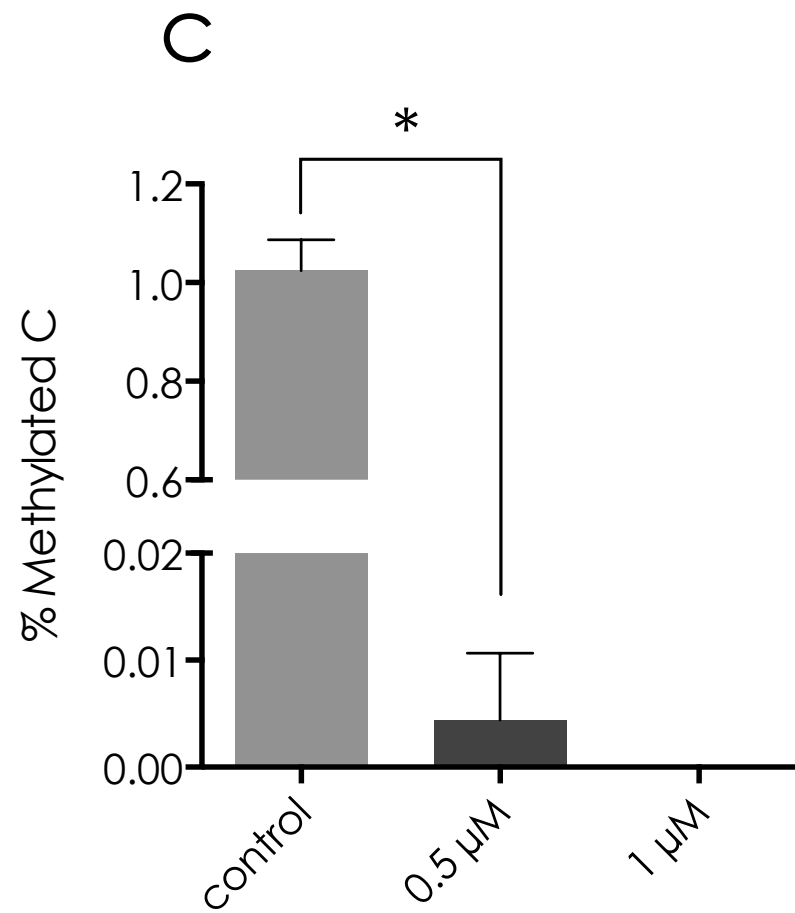



*DNMT1*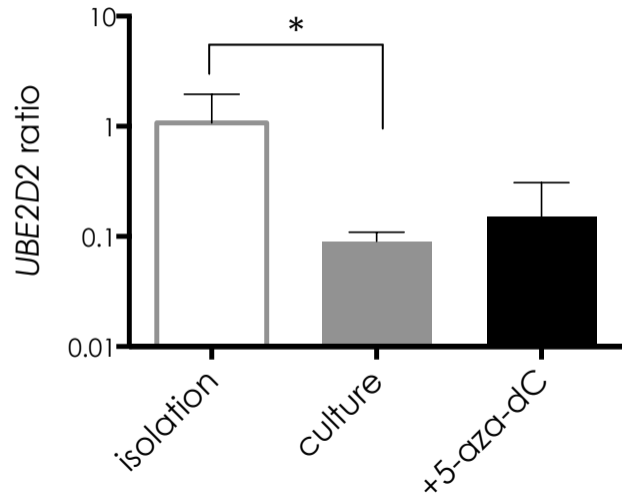*DNMT3A*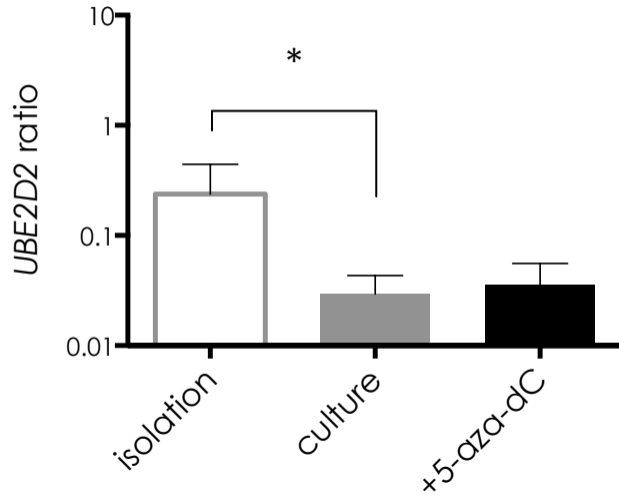*DNMT3B*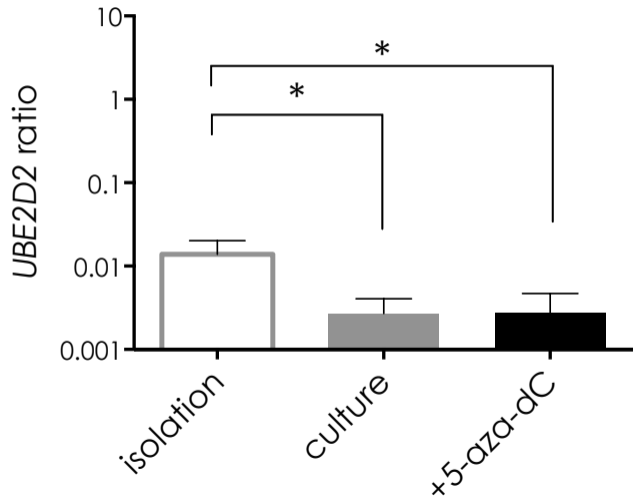

Source: https://www.biorxiv.org/content/10.1101/476069v1.full.pdf
